1

2

3 **Draft Genome of the Korean smelt *Hypomesus nipponensis* and its transcriptomic**  
4 **responses to heat stress in the liver and muscle**

5 Biao Xuan<sup>1,2</sup>, Jongbin Park<sup>1,2</sup>, Sukjung Choi<sup>2</sup>, Inhwon You<sup>1,2</sup>, Bo-Hye Nam<sup>3</sup>, Eun Soo  
6 Noh<sup>3</sup>, Eun Mi Kim<sup>3</sup>, Mi-Young Song<sup>4</sup>, Younhee Shin<sup>5</sup>, Ji-Hyeon Jeon<sup>5,6</sup> and Eun Bae  
7 Kim<sup>1,2,#</sup>

8 <sup>1</sup> Department of Applied Animal Science, College of Animal Life Sciences, Kangwon National  
9 University, Chuncheon 24341, Kangwon-do, Republic of Korea

10 <sup>2</sup> Laboratory of Microbial Genomics and Big Data, College of Animal Life Sciences, Kangwon  
11 National University, Chuncheon 24341, Kangwon-do, Republic of Korea

12 <sup>3</sup> Biotechnology Research Division, National Institute of Fisheries Science, Busan 46083, Korea

13 <sup>4</sup> Inland Fisheries Research Institute, National Institute of Fisheries Science, Gapyeong 12453,  
14 Korea

15 <sup>5</sup> Research and Development Center, Insilicogen Inc, Yongin 16954, Republic of Korea

16 <sup>6</sup> Department of Biological Science, Sungkyunkwan University, Suwon 16419, Korea

17

18 **# Corresponding author**

19 **Mailing address:** Department of Applied Animal Science, College of Animal Life Sciences,  
20 Kangwon National University, Chuncheon 200-701, Republic of Korea.

21 **Tel:** +82-33-250-8642

22 **Fax:** +82-33-259-5574

23 **E-mail:** [itanimal@kangwon.ac.kr](mailto:itanimal@kangwon.ac.kr)

24

25 **Abstract**

26 Pond smelt (*Hypomesus nipponensis*) is a cold-freshwater fish species as a winter  
27 economic resource of aquaculture in South Korea. Due to its high susceptibility to  
28 abnormal water temperature from global warming, a large number of smelt die in hot  
29 summer. Here, we present the first draft genome of *H. nipponensis* and transcriptomic  
30 changes in molecular mechanisms or intracellular responses under heat stress. We  
31 combined Illumina and PacBio sequencing technologies to generate the draft genome of  
32 *H. nipponensis*. Based on the reference genome, we conducted transcriptome analysis of  
33 liver and muscle tissues under normal (NT, 5°C) versus warm (HT, 23°C) conditions, to  
34 identify heat stress-induced genes and gene categories. We observed a total of 1,987  
35 contigs, with N<sub>50</sub> of 0.46 Mbp with a largest contig (3.03 Mbp) in the assembled genome.  
36 A total number of 20,644 protein coding genes were predicted, and 19,224 genes were  
37 functionally annotated: 15,955 genes for Gene Ontology (GO) terms; and 11,560 genes  
38 for KEGG Orthology (KO). We conducted the lost and gained genes analysis compared  
39 with three species that human, zebrafish and salmon. In the lost genes analysis, we  
40 detected smelt lost 4,461 (22.16%), 2,825 (10.62%), and 1,499 (3.09%) genes compare  
41 with above three species, respectively. In the gained genes analysis, we observed smelt  
42 gain 1,133 (5.49%), 1,670 (8.09%), and 229 (1.11%) genes compare with above species,  
43 respectively. From transcriptome analysis, a total of 297 and 331 differentially expressed  
44 genes (DEGs) with False discovery rate (FDR) < 0.05 were identified in the liver and  
45 muscle tissues, respectively. Gene enrichment analysis of DEGs indicates that up-  
46 regulated genes were significantly enriched for lipid biosynthetic process (GO:0008610,  
47 P < 0.001) and regulation of apoptotic process (GO:0042981, P < 0.01), and down-

48 regulated genes by immune responses such as myeloid cell differentiation (GO:0030099,  
49  $P < 0.001$ ) in the liver under heat stress. In muscle tissue, up-regulated genes were  
50 enriched for hypoxia (GO:0001666,  $P < 0.05$ ), transcription regulator activity  
51 (GO:0140110,  $P < 0.001$ ) and calcium-release channel activity (GO:0015278,  $P < 0.01$ ),  
52 and down-regulated genes for nicotinamide nucleotide biosynthetic process (GO:0019359,  
53  $P < 0.01$ ). The results of KEGG pathway analysis were similar to that of gene enrichment  
54 analysis. The draft genome and transcriptomic of *H. nipponensis* will be used as a useful  
55 genetic resource for functional and evolutionary studies. Our findings will improve  
56 understanding of the molecular mechanisms and heat responses and **will be useful for**  
57 **predicting** survival of the smelt and its closely related species under global warming.

58

59 **Keywords:** *Hypomesus nipponensis*; genome; transcriptome; high temperature; heat  
60 stress.

61

62

63

64

65

66

67

68

69

## Introduction

70 Pond smelt (*Hypomesus nipponensis*) is a member of the family Osmeridae native to  
71 several countries, such as South Korea, China, Japan and the United States. Smelt as a  
72 cold-freshwater fish species it is called “Bing eo” in Korea, which means ice-fish,  
73 because it resides in low-temperature water that 0 to 15°C, and it is very popular as  
74 winter fishing and food in Korea, so there are many smelt festivals are held in winter.  
75 Smelt is an anadromous species(Saruwatari, Lopez, & Pietsch, 1997), however, now it is  
76 cultivated in many reservoirs in South Korea. In a previous study, smelt samples from  
77 South Korea were identified as *H. nipponensis* (Choi & Kim, 2019).

78 The abnormal increase of temperature leads to the death of a large number of cold-water  
79 fish species. Therefore, many studies have focused on the acute and chronic heat stress of  
80 fish(Logan & Buckley, 2015). In Korea, there are local news report that the death of  
81 smelt in hot summer brings serious harm to the smelt industry. Therefore, understanding  
82 the characteristics of smelt will greatly improve the problems faced, however, there is no  
83 research on the genome or transcriptome of *H. nipponensis*. Furthermore, transcriptome  
84 analysis provides useful insight into the specific and general response to water  
85 temperature, such as heat shock response(Narum & Campbell, 2015). In addition, the  
86 cellular response of different smelt species to high water temperature is different. In  
87 longfin smelt, many DEGs associated with heat shock proteins and chaperones that up-  
88 regulated generally in fish response to heat stress. Conversely, in Delta smelt, DEGs  
89 associated with protein synthesis and metabolic processes(Basu et al., 2002). Cells  
90 generally regulate their own genes to survive under stress; however, occasionally they  
91 start programming cell death to induce apoptosis(Fulda, Gorman, Hori, & Samali, 2010).

92 Increasing water temperature has many effects on fish such as oxidative stress,  
93 endoplasmic reticulum (ER) stress, decreased immune function, hypoxia, and  
94 reproductive dysfunction affecting egg production and fertility(Lu et al., 2016; Olsvik,  
95 Vikeså, Lie, & Hevrøy, 2013; Qiang et al., 2017). Since specific responses of different  
96 tissues were different under heat stress, many heat stress-related studies used different  
97 tissues of fish such as the liver, muscle, heart, kidney, brain, and gill (Logan & Buckley,  
98 2015). For example, ER stress was identified in Atlantic salmon liver under heat stress,  
99 while ER stress promoted cell repair and reduced unfolded proteins; however, excessive  
100 ER stress led to cell apoptosis (Shi et al., 2019). ER stress also occurs in heat stress-  
101 treated rainbow trout *Oncorhynchus mykiss*, and it is accompanied by changes in the  
102 immune system and post-transcriptional regulation of spliceosome (Huang, Li, Liu, Kang,  
103 & Wang, 2018). In teleost coho salmon (*Oncorhynchus kisutch*) liver, severe heat  
104 stressors can affect the redox state and induce oxidative stress (Nakano et al., 2014).  
105 Moreover, water temperature affects the concentration of dissolved oxygen in water, low-  
106 oxygen concentration in water is fatal to fish, leading to hypoxia, dissolved oxygen plays  
107 an important role in maintaining biochemical and physiological processes. Hypoxia may  
108 limit energy processes and adversely affect growth, reproduction and survival(Kelly et al.,  
109 2020). There are many factors affecting the growth and survival of fish, therefore, it is  
110 necessary to clarify the mechanism of heat stress responses of smelt to reduce the  
111 mortality effectively.

112 In the present study, we used sequencing technology to analyze the whole genome of *H.*  
113 *nipponensis* and transcriptome analysis to compare gene expression to understand the

114 intracellular response mechanism of *H. nipponensis* at different temperatures in the liver  
115 and muscle tissues.

## 116 **Materials and Methods**

### 117 **Ethics statement**

118 All the procedures performed on animals were approved by the Institutional Animal Care  
119 and Use Committee (IACUC accept number: KW-181109-2) at Kangwon National  
120 University.

### 121 **Source of *H. nipponensis* and genome sequencing**

122 **Whole genome sequencing was conducted for 3 samples of smelt from Inje narincheon**  
123 **(South Korea, 38° 04' 34.0" N; 128° 11' 17.2" E)** and the genomic DNA was extracted  
124 from the whole bodies using DNeasy<sup>®</sup> Blood & Tissue kit (Qiagen, GmbH, Hilden,  
125 Germany). Illumina libraries for whole bodies were constructed using the TruSeq Nano  
126 Sample Prep kit (Illumina, San Diego, CA, USA) following the manufacturer's  
127 instructions. PacBio Sequel platform library was constructed using the PacBio Template  
128 Prep kit. **PacBio generated reads were used for *de novo* assembly and Illumina paired-end**  
129 **reads were mapped to the draft genome assembly to error correct by pilon v.1.23(Walker**  
130 **et al., 2014). *de novo* assembly with PacBio reads was conducted by FALCON-UNZIP**  
131 **software 1.2.5 version, using the parameters length\_cutoff = 13kb and length\_cutoff\_pr =**  
132 **10kb. *H. nipponensis* genome size was estimated using k-mer (17-, 19- and 21-mers)**  
133 **analysis with Jellyfish 2.1.3 software.** The assembly quality was assessed using  
134 Benchmarking Universal Single Copy Orthologs (BUSCO) v.3.0(Simão, Waterhouse,

135 Ioannidis, Kriventseva, & Zdobnov, 2015). Figure S1 shows the analysis workflow of  
136 fish genome.

### 137 **PacBio (Iso-Seq) sequencing**

138 Total RNA was isolated from liver and muscle tissues. For PacBio Iso-Seq data, we  
139 randomly selected 12 samples from the transcriptome analysis group (six liver and six  
140 muscle samples). The total RNA of the 12 samples were pooled for sequencing. The Iso-  
141 Seq library was prepared with SMATer PCR cDNA Synthesis kit. We used Trinity (Haas  
142 et al., 2013) software to perform a genome-guided assembly and combine Iso-Seq data to  
143 predict gene model.

### 144 ***H. nipponensis* genome functional annotation**

145 The predicted genes were subjected to search against the National Center for  
146 Biotechnology Information (NCBI) non-redundant protein database (20190306 ver.)  
147 using BLASTx, with an e-value cutoff of  $1E^{-3}$ . Gene name and description were assigned  
148 to each gene based on the highest hit with BLASTx. The genes were submitted to Gene  
149 Ontology (GO) and Kyoto Encyclopedia of Genes and Genomes (KEGG) databases to  
150 obtain the functional category and pathway information using Blast2GO and KAAS  
151 (Moriya, Itoh, Okuda, Yoshizawa, & Kanehisa, 2007), respectively.

### 152 **Temperature trial and tissue sampling for RNA sequencing**

153 **Smelt were caught in the Hwacheon Dam (South Korea, 38° 07' 01.1" N; 127° 46' 43.1"**  
154 **E)** and one hundred fish were randomly placed in two 20-L tanks (50 fish per tank, NT  
155 and HT groups). The fish were fed, and **acclimatization** occurred for 2 h at a water (from  
156 Hwacheon Dam) temperature of 5°C. After acclimation, to simulate temperature

157 condition in natural environment, one tank was heated from 5°C to 23°C at a constant  
158 rate of 4.5°C per h by hotrod, while the other tank was maintained at the same  
159 temperature (5°C) with ice pack. Oxygen was supplied throughout the experiment.  
160 Sampling began until loss of equilibrium fish population appeared in the HT group  
161 (23°C); however, no loss of equilibrium fish population was observed in the NT group  
162 (5°C). **A total of eight female fish were sampled (four active and four inanimate from NT  
163 and HT groups, respectively) and a total of twelve male fish were sampled (six active and  
164 six inanimate from NT and HT groups, respectively).** After being sacrificed, muscle and  
165 liver tissues were immediately frozen in liquid nitrogen for gene expression profiling  
166 analysis.

### 167 **Constructing mRNA libraries and sequencing**

168 Tissue mRNA was extracted from the liver and muscle samples using TRIzol<sup>®</sup> reagent  
169 (Thermo Fisher Scientific, Waltham, MA, USA) and purified to remove DNA  
170 contamination using the TURBO DNA-free<sup>™</sup> kit (Invitrogen, Carlsbad, CA, USA). RNA  
171 concentration and quality were determined using an Epoch Microplate  
172 Spectrophotometer (BioTek, Winooski, VT, USA). The thirty-seven sequencing libraries  
173 were created by reverse-transcription from 2 µg of RNA from each sample using the  
174 **TruSeq Stranded mRNA Library Prep kit (Illumina, San Diego, CA, USA).** Index  
175 adapters were added to identify sequences for each sample in the final data. Subsequently,  
176 the thirty-seven libraries were subjected to paired-end (2 × 101 bp) sequencing on the  
177 Illumina NovaSeq6000 Sequencing system.

### 178 **Detection of lost and gained genes**



179 To detect lost and gained genes in the Korean smelt genome, we compared their  
180 fragmented sequences (**raw reads, assembled DNA contigs and assembled RNA**  
181 **transcripts**) with several reference genome of that the human (*Homo sapiens*), zebrafish  
182 (*Danio rerio*) and Atlantic salmon (*Salmo salar*). Sequence alignment was conducted by  
183 GASSST (v1.28) software. Figure S2 shows the method that sequence alignment  
184 coverage (%) was calculated for each gene from the alignment. As a low alignment  
185 coverage (less than 10%) indicates absence of a gene in the genome.

### 186 **Data analysis of mRNA**

187 After removing the reads containing adaptor contamination using Trimmomatic v0.36,  
188 the clean reads were mapped to the assembled reference *H. nipponensis* genome using  
189 Bowtie v2.2.3. RSEM v1.2.31 was used to quantify gene abundances according to each *H.*  
190 *nipponensis* gene. Analysis of genes differentially expressed in the NT and HT groups  
191 was performed using the edgeR package (Robinson, McCarthy, & Smyth, 2009), and  
192 FDR < 0.05 was considered as a threshold to identify significantly differentially  
193 expressed genes (DEGs). GO enrichment analysis and KEGG statistical enrichment  
194 analysis of DEGs were performed using in-house perl scripts (parent-child method) and  
195 clusterProfiler R package (Yu, Wang, Han, & He, 2012), respectively. The significantly  
196 enriched GO terms were determined by Fisher's exact test with a  $p < 0.05$ , and KEGG  
197 pathways were determined using FDR < 0.05.

### 198 **Data accessibility**

199 *Hypomesus nipponensis* genome assembly was deposited in National Center for  
200 Biotechnology Information (NCBI) with accession number of SAMN16577099. RNA-

201 Seq raw sequences were deposited in the Short Read Archive of the NCBI with accession  
202 number PRJNA672783.

203

## 204 **Results**

### 205 **Genome sequence data and genome size estimation**

206 Using the PacBio long-read sequencing approach, a 126× coverage (58.60 Gbp) of *H.*  
207 *nipponensis* genome was obtained from > 20-kb libraries. **The short-read libraries**  
208 **(Illumina) generated an 80× coverage (36.99 Gbp) of genome was obtained from paired**  
209 **end sequencing (2x101bp) (Table S1).** The genome size was estimated to be 464 Mb  
210 using k-mer (k=17) analysis (Table S2, Figure S3).

### 211 **Iso-Seq data generation**

212 **Isoform sequencing (PacBio) generated 0.49 Gb of data, which included 477,478 circular**  
213 **consensus sequences (CCS) reads and 1,023 mean of CCS read length,** yielding 18,799  
214 transcripts (Table S3), which were used to generate the assistant file for *ab initio* gene  
215 model prediction.

### 216 **De novo assembly of genome and quality assessment**

217 Using long-read sequences from PacBio, the primary genome assembly was 631.85 Mbp  
218 in size, with 4,106 contigs (largest contig of 3.03 Mbp, N<sub>50</sub> of 0.32 Mbp, and L<sub>50</sub> of 477).  
219 **Evaluation of the genome completeness analysis, against the 4,584 genes of**  
220 ***Actinopterygii*, BUSCO result shows the 4,290 genes (93.6%) were completely retrieved**  
221 **in the assembled genome, including 3,911 single-copy genes (85.3%) and 379 duplicated**

222 genes (8.3%). In addition, 84 fragmented genes (1.8%) and 210 missing genes (4.5%)  
223 were found (Table S4). After error correction using pilon, the final improved primary  
224 genome assembly of 1,987 contigs showed a total size of 499.59 Mbp, with an N<sub>50</sub> of  
225 0.46 Mbp, L<sub>50</sub> of 300 contigs, GC content of 45.64%, and the largest contig length of  
226 3.03 Mbp (Table S5). Table S6 and S7 show the Illumina and PacBio sequencing  
227 statistics. Table 1 shows the *H. nipponensis* draft genome statistics.

### 228 Gene prediction and functional annotation

229 Evidence-based *ab initio* gene predictions with Augustus predicted 20,644 protein-coding  
230 genes. Among these, 93.12% (19,224) predicted genes were annotated using the non-  
231 redundant database, while 6.88% (1,420) genes remained unannotated (Table S8). Figure  
232 1.A shows the Blast top 10 hit species. Analysis of GO terms revealed that they were  
233 assigned to 15,955 genes on the three primary categories of ontology (biological process  
234 (BP), cellular component (CC), and molecular function (MF)). Figure 1B shows the top  
235 10 assigned GO terms for each category. A total of 11,560 genes were annotated with  
236 seven categories on 447 pathways. Figure 1C shows the top three assigned KEGG terms  
237 for each category. Table 2 shows the *H. nipponensis* consensus gene model.

### 238 Genome comparison for detection of lost and gained genes

239 We compared the genome of *H. nipponensis* with that of other species, including *Homo*  
240 *sapiens*, *Danio rerio*, and *Salmo salar* for detection of lost and gained genes. For lost  
241 genes found from the alignment of *H. nipponensis* genome to those of the other species,  
242 we compared 20,129, 26,612, and 48,548 genes in *H. sapiens*, *D. rerio*, and *S. salar*,  
243 respectively. We detected 4,461 (22.16%), 2,825 (10.62%), and 1,499 (3.09%) genes

244 with coverage less than 10% and 6,047 (30.04%), 3,901 (14.66%), and 2,008 (4.14%)  
245 genes with coverage less than 15% (Table S9). For gained genes found from the  
246 alignment of 20,644 genes of *H. nipponensis* to those of the other species, we observed  
247 1,133 (5.49%), 1,670 (8.09%), and 229 (1.11%) genes with coverage less than 10% and  
248 1,911 (9.26%), 2,484 (12.03%), and 362 (1.75%) genes with coverage less than 15%  
249 (Table S10).

### 250 **GO enrichment of lost and gained genes**

251 Gene enrichment analysis comparing smelt with human showed that smelt lost some  
252 genes involved in stimulus, reproduction, nucleotide and metal ions. Comparing with  
253 salmon showed that smelt lost chemotaxis, immune system, lipid, mitochondria, neuron,  
254 nucleotide and reproduction related genes (Table S11). In gained genes enrichment  
255 analysis, compared with human, smelt gained chemotaxis, heparin production, immune  
256 system and stimulation related genes. Compared with zebrafish and salmon, smelt gained  
257 chemotaxis and immune system related genes, respectively (Table S12).

### 258 **RNA-seq of liver and muscle transcriptome profiles at different temperature** 259 **conditions**

260 To identify differences in gene expression in smelt liver and muscle tissues at different  
261 temperatures, we constructed and sequenced twenty cDNA libraries on Illumina  
262 NovaSeq6000 platform with pair-end sequencing. The clean reads were generated by  
263 filtering the raw reads from the NT and HT groups. Table S13 and S14 shows the  
264 statistics of clean reads filtered from raw reads, and the mean quality is more than 30%  
265 for each sample.

## 266 **Gene expression profiling**

267 A total of 297 and 331 genes were significantly differentially expressed in female liver  
268 and muscle tissues in the HT group compared to those in the NT group, respectively  
269 ( $|\log_2[\text{Fold change}]| > 1$ ,  $\text{FDR} < 0.05$ ). In the female liver tissue, 297 DEGs, including  
270 154 up-regulated DEGs and 143 down-regulated DEGs, were identified. In the female  
271 muscle tissue, 331 DEGs, including 192 up-regulated DEGs and 139 down-regulated  
272 DEGs, were identified. In the male liver tissue, 8 DEGs, including 4 up-regulated DEGs  
273 and 4 down-regulated DEGs, were identified. In the male muscle tissue, 29 DEGs,  
274 including 9 up-regulated and 20 down-regulated DEGs, were identified (Figure 2). The  
275 volcano plot showed the DEG analysis in male liver and muscle tissues. **Since the**  
276 **number of DEGs in male tissue is significantly less than that in female tissue, the**  
277 **following gene functional enrichment analysis only involves female tissue. Table S16**  
278 **shows all DEGs.**

## 279 **GO analysis of DEGs in the liver and muscle**

280 In enrichment analysis, DEGs were enriched GO terms (threshold as  $p < 0.05$  and odds  
281 ratio  $> 1$ ). For the liver, 128 up-regulated and 115 down-regulated DEGs were annotated  
282 with GO terms. Up-regulated GO terms including lipid metabolism, cell death, DNA  
283 binding and stress related genes and down-regulated GO terms including immune system,  
284 membrane protein and digestion related genes (Table 3). For the muscle, 161 up-  
285 regulated and 114 down-regulated DEGs were annotated with GO terms. Up-regulated  
286 GO terms including apoptosis, hypoxia, ion transportation, transcription and component  
287 organization related genes and down-regulated GO terms including nicotinamide  
288 nucleotide and ubiquitination related genes (Table 4).

## 289 **KEGG pathway enrichment analysis of DEGs in the liver and muscle**

290 Four KEGG pathways were enriched in the liver tissue. One pathway (FDR < 0.1),  
291 including the terpenoid backbone biosynthesis pathway, was up-regulated, while three  
292 pathways (FDR < 0.05), including influenza A, Jak-STAT signaling, and pancreatic  
293 secretion pathways, were down-regulated. Thirty-two KEGG pathways were enriched in  
294 the muscle tissue. Mitogen-activated protein kinase (MAPK) signaling (FDR < 0.05),  
295 oxytocin signaling pathways (FDR < 0.05) and HIF-1 signaling pathway (FDR < 0.05)  
296 were up-regulated, while four pathways (FDR < 0.05), including inflammatory bowel  
297 disease (IBD), Leishmaniasis, African trypanosomiasis, and type I diabetes mellitus  
298 pathways, were down-regulated (Figure 3).

## 299 **Discussion**

300 *H. nipponensis* is one of popular freshwater fish species in South Korean winter. With the  
301 rise in global warming, fish are suffering from heat stress, and a large number of deaths  
302 have been observed, resulting in great economic losses to the aquaculture industry. The  
303 present study reports the first high-quality draft genome assembly of *H. nipponensis* from  
304 the family Osmeridae (order Osmeriformes) and the analysis of transcriptome in heat  
305 stress to elucidate the mechanism of cellular response in liver and muscle tissues.

## 306 **Genome sequencing**

307 We successfully generated *H. nipponensis* draft genome assembly of 1,987 highly  
308 contiguous contigs (498.3 Mbp), with a high N<sub>50</sub> (0.47 Mbp). The estimated genome size  
309 of 464 Mbp was consistent with that of another member of Osmeridae and greater than  
310 that of *Osmerus eperlanus* (European smelt, 342.8 Mbp) in the family Osmeridae

311 (Malmstrøm et al., 2016). Compared with other species (mammal, bird, bony fish and  
312 cartilaginous fish), the genome size of smelt is smaller than that of other species, but the  
313 GC content of genome and coding sequence (CDS) and GC content of CDS are similar to  
314 those of other species, and the number of CDS is even more than that of other species  
315 (Table S15). The genome size of *H. nipponensis* is within the range of most published  
316 fish genome size(Fan et al., 2020).

### 317 **Lost and gained genes**

318 In the lost gene analysis, we compared *H. nipponensis* to human (*H. sapiens*), Zebrafish  
319 (*D. rerio*), and Atlantic salmon (*S. salar*). The lowest number of lost genes were observed  
320 when comparing *H. nipponensis* to *S. salar*, because salmon was a cold-water species that  
321 lived in similar water temperature. In addition, these two species are both anadromous,  
322 also, Osmeriformes are close relatives of the Salmoniformes. One of smelt species that  
323 rainbow smelt (*Osmerus mordax*) has high levels of similarity (86%) to salmonid  
324 genes(Von Schalburg et al., 2008). In the lost gene enrichment analysis, compared to  
325 human, smelt may not feel bitter taste, because smelt eat phytoplankton, they may lose  
326 their taste buds of bitterness in order to survive. In study, comparing naked mole rat  
327 (NMR) and human genome, NMR lost their receptors for bitter taste, because NMR live  
328 underground and their staple food is plant roots that are most of bitter taste, which  
329 facilitates this evolution (Kim et al., 2011). Moreover, the spermatogenesis of smelt may  
330 be different from that of human. With evolution, the genes involved in sex- and  
331 reproduction-related genes, such as mating behavior, fertilization, spermatogenesis and  
332 sex determination evolve with environmental changes(Volff, 2005). The function of  
333 cytosine is less than that of human, ammonia may not be discharged smoothly when

334 nitrogen is excreted. Compared with salmon, sperm capacitation of smelt may be  
335 different from that of salmon. In gained genes functional enrichment analysis, compared  
336 with human, smelt have more genes related to heparin production, which may be due to  
337 the fact that living environment of smelt is low temperature, and heparin may prevent  
338 blood coagulation. Moreover, smelt may be more sensitive to light than human. Fish live  
339 in a different light environment from terrestrial species. However, water absorbs light, so  
340 as the water depth increases, the amount of light available decreases. Compared with  
341 zebrafish and salmon, the immune system of smelt is more complex.

#### 342 **Transcriptome analysis**

343 The comparative gene expression profiles in heat-stressed and normal groups are useful  
344 for understanding the mechanism of cellular responses under heat stress. In the HT group,  
345 when the temperature reached 23°C, smelt began to lose the population equilibrium,  
346 beginning to die, and there was no dead fish in the NT group. The liver is a vital  
347 metabolic organ that relates to stress response. In the gene enrichment analysis, we found  
348 that some genes involved in lipid metabolism, like lipid biosynthetic process, isoprenoid  
349 metabolic process and steroid metabolic process. Lipid is the main component of cell  
350 membrane, because acute heat stress may increase the fluidity of cell membrane, and the  
351 increase of lipid metabolism may be to maintain the stability of cell membrane. Also,  
352 lipid is the main component of fat, which can block the external heat, and lipid  
353 metabolism may increase the synthesis of fat to block the external heat. In *T. bernacchii*  
354 thermal acclimation study, there was resulted in an increase of membrane saturated fatty  
355 acids(Malekar et al., 2018). Moreover, lipid might help to maintain energy homeostasis in  
356 fish, as lipids were the basic components of sterols. Due to the membrane unique



357 molecular structure, it has a thermal sensitive macromolecular structure. Environmental  
358 stress activates lipid metabolic enzymes and targets downstream signaling  
359 pathway(Balogh et al., 2013). Poikilothermic organisms are able to maintain their  
360 membrane fluidity for temperature fluctuation-induced cellular disturbance by regulating  
361 the composition of membrane lipids through physiological and biochemical mechanisms  
362 of homeoviscous adaptation(Mendoza, 2014). After heat shock, the plasma lipid peroxide  
363 level increase gradually and severe heat stress affects the redox state and causes oxidative  
364 stress in salmon(Nakano et al., 2014). When fish suffer from hypoxia, fat metabolism is  
365 enhanced. Isoprenoid and terpenoid metabolic process-related genes such as *HMGCS1*,  
366 *HMGCR*, and *FDPS* were up-regulated in liver tissue. These genes are involved in  
367 squalene synthesis. **In human cancer cells study, hypoxic cells display profound**  
368 **accumulation of squalene(Kucharzewska, Christianson, & Belting, 2015).** Additionally, it  
369 plays an anti-oxidant role that eliminates ROS produced under stress(Micera et al., 2020).  
370 Squalene synthase is up-regulated in the liver. This was the main material for the  
371 synthesis of sterols, and steroid metabolic process-related genes were up-regulated in the  
372 liver under heat stress. In other studies, heat stress led to the increase in estrogen level,  
373 and hormonal disorders led to an imbalance in the number of males and females in the  
374 population (Shi et al., 2019). Some genes related to regulation of apoptotic process were  
375 significantly up-regulated under heat stress. Although cells have different protective  
376 mechanisms under stress, the enhancement of stress can lead to cell signal interruption,  
377 extensive DNA damage, and cell apoptosis (Cheng et al., 2015). DNA damage is caused  
378 by hypoxia, leading to replication stress. Moreover, some genes related to regulation of  
379 cellular response to stress such as *PLRG1*, *RTEL1*, and *ING2* were up-regulated. *PLRG1*

380 is involved in pre-mRNA splicing as a component of the spliceosome critical for heat  
381 environment adaptation (Huang et al., 2018). *RTEL1* and *ING2* play a role in DNA repair  
382 under heat stress, indicating that liver tissue has replication problems under heat stress.  
383 However, some genes related to erythrocyte characteristics, including GO term  
384 erythrocyte differentiation, erythrocyte development, and regulation of anatomical  
385 structure size, were significantly down-regulated under heat stress. Erythrocytes are  
386 cellular mediators of the immune response in teleost fish, thus, the immunity of smelt was  
387 reduced under heat stress. In addition, the genes related to cell membrane signal  
388 transduction were down-regulated in heat stress group, which indicates that it is difficult  
389 for cells to communicate with extracellular under the condition of homeostasis imbalance.  
390 Moreover, digestion related genes have also been down-regulated, suggesting that  
391 abnormal temperatures lead to **feeding may be reduced**, so fish should be fed less in hot  
392 summer. **Study has shown that the digestive enzymes activity was significantly affected**  
393 **by abnormal temperature(Pimentel et al., 2015)**. The effect of water temperature on  
394 digestive enzymes of fish depends on species, because the optimal temperature of  
395 enzyme activity is usually in the temperature range corresponding to the fish  
396 habitat(Volkoff & Rønnestad, 2020). The muscle is greatly affected by heat stress, as, in  
397 most species, this tissue constitutes approximately 50% of the body mass. Under heat  
398 stress, apoptosis, hypoxia, ion transportation, transcription- and component organization-  
399 related genes were up-regulated. Due to high temperature, muscle cells lose calcium  
400 balance, which will cause muscle spasm, and muscle contraction-related genes that those  
401 actin-filament genes were up-regulated, also, hypoxia can cause muscle contraction. **In**  
402 **oxygen consumption study, when the water temperature rises from 14°C to 20°C, the**

403 oxygen consumption of Delta smelt increases with the increase of temperature(Jeffries et  
404 al., 2016). In addition, nicotinamide adenine dinucleotide (NADH)- and ubiquitination-  
405 related genes associated with cell respiration and energy metabolism were down-  
406 regulated. This might be due to the decrease in collective energy metabolism caused by  
407 hypoxia.

408 In pathway enrichment analysis, under heat stress, terpenoid backbone biosynthesis  
409 pathway in the liver was up-regulated. The genes involved in this pathway are implicated  
410 in the final synthesis of squalene, which is an important enzyme under hypoxia condition.  
411 Immune-related pathways, including influenza A and Jak-STAT signaling pathways,  
412 were down-regulated. Digestion-related pancreatic secretion, protein digestion, and  
413 absorption pathways were down-regulated in the liver. This suggested that the digestive  
414 function of fish was disrupted under heat stress. In the muscle, several genes involved in  
415 MAPK signaling pathway were up-regulated under heat stress. A recent study has shown  
416 that MAPK signaling pathway is activated in response to ER stress (Darling & Cook,  
417 2014). The disturbance of ER environment such as the decrease in  $Ca^{2+}$  concentration or  
418 the change in redox state can affect protein folding and processing. Once misfolded  
419 proteins accumulate, ER stress activates a series of corresponding pathways. Under heat  
420 stress, some enriched genes in oxytocin signaling pathway were also up-regulated.  
421 Oxytocin activates the signal pathways of mRNA translation during ER stress (Klein et  
422 al., 2016). HIF-1 signaling pathway was also up-regulated in the muscle tissue, indicating  
423 that smelt suffered hypoxia stress in acute increasing temperature. *HIF1A* is the main  
424 regulator of hypoxia-induced gene expression. The metabolism of smelt increases with  
425 the rise in temperature, which may lead to lack of oxygen. Smelt lives in low-temperature

426 environments, and the oxygen solubility in low-temperature water is higher than that in  
427 high-temperature water, thus, smelt is likely to have fewer red blood cells than those of  
428 temperate fish. Hypoxic stress induced unfolded protein response (UPR) and autophagy.  
429 Hypoxia causes perturbations in the ER activity, resulting in UPR activation. These up-  
430 regulated pathways suggested that smelt suffered hypoxia and ER stress under heat stress.  
431 ER stress-related genes *NFE2L1* and *ERGIC1* were up-regulated in the muscle tissue. ER  
432 stress was also observed under heat stress in Atlantic salmon (Shi et al., 2019). **IBD,**  
433 **Leishmaniasis, African trypanosomiasis and type I diabetes mellitus pathways were down-**  
434 **regulated in muscle under heat stress, these are related to immune and infectious diseases,**  
435 **considering that heat stress has a negative effect on the inner immune system(Lyu et al.,**  
436 **2018).**

437

438

## Conclusions

439 Using long reads and short reads from PacBio Sequel and NovaSeq6000 platform,  
440 respectively, we successfully assembled the draft genome and obtained the first reference  
441 genome of *H. nipponensis*. In transcriptome analysis, smelt suffer from hypoxia and ER  
442 stress, which leads to severe oxidative stress in the body under heat stress. These results  
443 provide a better understanding of the molecular mechanisms regulating the response of *H.*  
444 *nipponensis* under heat stress, which will help to prevent and treat damage to fish caused  
445 by high-water temperature.

446

447 **Acknowledgments**

448 This research was supported by a grant from the Collaborative Genome Program of the  
449 Korea Institute of Marine Science and Technology Promotion (KIMST) funded by the  
450 Ministry of Oceans and Fisheries (MOF) (No. 20180430) and the National Institute of  
451 Fisheries Science (R2020034). Biao Xuan was supported by the BK21 Plus Program  
452 from Ministry of Education.

### 453 **Literature Cited**

454 Balogh, G., Péter, M., Glatz, A., Gombos, I., Török, Z., Horváth, I., ... Vigh, L. (2013).

455 Key role of lipids in heat stress management. *FEBS Letters*, 587(13), 1970–1980.

456 <https://doi.org/10.1016/j.febslet.2013.05.016>

457 Basu, N., Basu, N., Todgham, A. E., Todgham, A. E., Ackerman, P. A., Ackerman, P.

458 A., ... Iwama, G. K. (2002). Heat shock protein genes and their functional

459 significance in fish. *Gene*, Vol. 295, pp. 173–183. Retrieved from

460 [papers2://publication/uuid/BD714DF2-29DF-4FED-8878-](https://pubmed.ncbi.nlm.nih.gov/12111111/)

461 [0752FA4DC4AA%5Cnpapers2://publication/uuid/B619098C-2E68-4688-877E-](https://pubmed.ncbi.nlm.nih.gov/12111111/)

462 [0C61FBDDE551](https://pubmed.ncbi.nlm.nih.gov/12111111/)

463 Cheng, C. H., Yang, F. F., Liao, S. A., Miao, Y. T., Ye, C. X., Wang, A. L., ... Chen, X.

464 Y. (2015). High temperature induces apoptosis and oxidative stress in pufferfish

465 (*Takifugu obscurus*) blood cells. *Journal of Thermal Biology*, 53, 172–179.

466 <https://doi.org/10.1016/j.jtherbio.2015.08.002>

467 Choi, S., & Kim, E. B. (2019). Complete mitochondrial genome sequence and SNPs of  
468 the Korean smelt *Hypomesus nipponensis* (Osmeriformes, Osmeridae).

469 *Mitochondrial DNA Part B: Resources*, 4(1), 1844–1845.

- 470 <https://doi.org/10.1080/23802359.2019.1613178>
- 471 Darling, N. J., & Cook, S. J. (2014). The role of MAPK signalling pathways in the  
472 response to endoplasmic reticulum stress. *Biochimica et Biophysica Acta -*  
473 *Molecular Cell Research*, 1843(10), 2150–2163.  
474 <https://doi.org/10.1016/j.bbamcr.2014.01.009>
- 475 Fan, G., Song, Y., Yang, L., Huang, X., Zhang, S., Zhang, M., ... He, S. (2020). Initial  
476 data release and announcement of the 10,000 Fish Genomes Project (Fish10K).  
477 *GigaScience*, Vol. 9. <https://doi.org/10.1093/gigascience/giaa080>
- 478 Fulda, S., Gorman, A. M., Hori, O., & Samali, A. (2010). Cellular stress responses: Cell  
479 survival and cell death. *International Journal of Cell Biology*.  
480 <https://doi.org/10.1155/2010/214074>
- 481 Haas, B. J., Papanicolaou, A., Yassour, M., Grabherr, M., Blood, P. D., Bowden, J., ...  
482 Regev, A. (2013). De novo transcript sequence reconstruction from RNA-seq using  
483 the Trinity platform for reference generation and analysis. *Nature Protocols*, 8(8),  
484 1494–1512. <https://doi.org/10.1038/nprot.2013.084>
- 485 Huang, J., Li, Y., Liu, Z., Kang, Y., & Wang, J. (2018). Transcriptomic responses to heat  
486 stress in rainbow trout *Oncorhynchus mykiss* head kidney. *Fish and Shellfish*  
487 *Immunology*, 82(April), 32–40. <https://doi.org/10.1016/j.fsi.2018.08.002>
- 488 Jeffries, K. M., Cannon, R. E., Davis, B. E., Komoroske, L. M., Britton, M. T., Sommer,  
489 T., ... Fanguie, N. A. (2016). Effects of high temperatures on threatened estuarine  
490 fishes during periods of extreme drought. *Journal of Experimental Biology*, Vol. 219,  
491 pp. 1705–1716. <https://doi.org/10.1242/jeb.134528>

- 492 Kelly, T., Johnsen, H., Burgerhout, E., Tveiten, H., Thesslund, T., Andersen, Ø., &  
493 Robinson, N. (2020). Low oxygen stress during early development influences  
494 regulation of hypoxia-response genes in farmed atlantic salmon (*Salmo salar*). *G3:*  
495 *Genes, Genomes, Genetics*, *10*(9), 3179–3188.  
496 <https://doi.org/10.1534/g3.120.401459>
- 497 Kim, E. B., Fang, X., Fushan, A. A., Huang, Z., Lobanov, A. V., Han, L., ... Gladyshev,  
498 V. N. (2011). Genome sequencing reveals insights into physiology and longevity of  
499 the naked mole rat. *Nature*, *479*(7372), 223–227.  
500 <https://doi.org/10.1038/nature10533>
- 501 Klein, B. Y., Tamir, H., Hirschberg, D. L., Ludwig, R. J., Glickstein, S. B., Myers, M. M.,  
502 & Welch, M. G. (2016). Oxytocin opposes effects of bacterial endotoxin on ER-  
503 stress signaling in Caco2BB gut cells. *Biochimica et Biophysica Acta - General*  
504 *Subjects*, *1860*(2), 402–411. <https://doi.org/10.1016/j.bbagen.2015.10.025>
- 505 Kucharzewska, P., Christianson, H. C., & Belting, M. (2015). Global profiling of  
506 metabolic adaptation to hypoxic stress in human glioblastoma cells. *PLoS ONE*, Vol.  
507 10. <https://doi.org/10.1371/journal.pone.0116740>
- 508 Logan, C. A., & Buckley, B. A. (2015). Transcriptomic responses to environmental  
509 temperature in eurythermal and stenothermal fishes. *Journal of Experimental*  
510 *Biology*, *218*(12), 1915–1924. <https://doi.org/10.1242/jeb.114397>
- 511 Lu, Y., Wu, Z., Song, Z., Xiao, P., Liu, Y., Zhang, P., & You, F. (2016). Insight into the  
512 heat resistance of fish via blood: Effects of heat stress on metabolism, oxidative  
513 stress and antioxidant response of olive flounder *Paralichthys olivaceus* and turbot

- 514 Scophthalmus maximus. *Fish and Shellfish Immunology*, 58, 125–135.  
515 <https://doi.org/10.1016/j.fsi.2016.09.008>
- 516 Lyu, L., Wen, H., Li, Y., Li, J., Zhao, J., Zhang, S., ... Wang, X. (2018). Deep  
517 Transcriptomic Analysis of Black Rockfish (*Sebastes schlegelii*) Provides New  
518 Insights on Responses to Acute Temperature Stress. *Scientific Reports*, Vol. 8.  
519 <https://doi.org/10.1038/s41598-018-27013-z>
- 520 Malekar, V. C., Morton, J. D., Hider, R. N., Cruickshank, R. H., Hodge, S., & Metcalf, V.  
521 J. (2018). Effect of elevated temperature on membrane lipid saturation in Antarctic  
522 notothenioid fish. *PeerJ*, 2018(5), 1–25. <https://doi.org/10.7717/peerj.4765>
- 523 Malmstrøm, M., Matschiner, M., Tørresen, O. K., Star, B., Snipen, L. G., Hansen, T.  
524 F., ... Jentoft, S. (2016). Evolution of the immune system influences speciation rates  
525 in teleost fishes. *Nature Genetics*, 48(10), 1204–1210.  
526 <https://doi.org/10.1038/ng.3645>
- 527 Mendoza, D. De. (2014). Temperature sensing by membranes. *Annual Review of*  
528 *Microbiology*, 68(April), 101–116. [https://doi.org/10.1146/annurev-micro-091313-](https://doi.org/10.1146/annurev-micro-091313-103612)  
529 103612
- 530 Micera, M., Botto, A., Geddo, F., Antoniotti, S., Berteza, C. M., Levi, R., ... Querio, G.  
531 (2020). Squalene: More than a step toward sterols. *Antioxidants*, Vol. 9, pp. 1–14.  
532 <https://doi.org/10.3390/antiox9080688>
- 533 Moriya, Y., Itoh, M., Okuda, S., Yoshizawa, A. C., & Kanehisa, M. (2007). KAAS: An  
534 automatic genome annotation and pathway reconstruction server. *Nucleic Acids*  
535 *Research*, 35(SUPPL.2), 182–185. <https://doi.org/10.1093/nar/gkm321>



- 536 Nakano, T., Kameda, M., Shoji, Y., Hayashi, S., Yamaguchi, T., & Sato, M. (2014).  
537 Effect of severe environmental thermal stress on redox state in salmon. *Redox*  
538 *Biology*, 2(1), 772–776. <https://doi.org/10.1016/j.redox.2014.05.007>
- 539 Narum, S. R., & Campbell, N. R. (2015). Transcriptomic response to heat stress among  
540 ecologically divergent populations of redband trout. *BMC Genomics*, Vol. 16.  
541 <https://doi.org/10.1186/s12864-015-1246-5>
- 542 Olsvik, P. A., Vikeså, V., Lie, K. K., & Hevrøy, E. M. (2013). Transcriptional responses  
543 to temperature and low oxygen stress in Atlantic salmon studied with next-  
544 generation sequencing technology. *BMC Genomics*, 14(1).  
545 <https://doi.org/10.1186/1471-2164-14-817>
- 546 Pimentel, M. S., Faleiro, F., Diniz, M., Machado, J., Pousão-Ferreira, P., Peck, M. A., ...  
547 Rosa, R. (2015). Oxidative stress and digestive enzyme activity of flatfish larvae in a  
548 changing ocean. *PLoS ONE*, Vol. 10. <https://doi.org/10.1371/journal.pone.0134082>
- 549 Qiang, J., Bao, W. J., Tao, F. Y., He, J., Li, X. H., Xu, P., & Sun, L. Y. (2017). The  
550 expression profiles of miRNA-mRNA of early response in genetically improved  
551 farmed tilapia (*Oreochromis niloticus*) liver by acute heat stress. *Scientific Reports*,  
552 7(1), 1–15. <https://doi.org/10.1038/s41598-017-09264-4>
- 553 Robinson, M. D., McCarthy, D. J., & Smyth, G. K. (2009). edgeR: A Bioconductor  
554 package for differential expression analysis of digital gene expression data.  
555 *Bioinformatics*, 26(1), 139–140. <https://doi.org/10.1093/bioinformatics/btp616>
- 556 Saruwatari, T., Lopez, J. A., & Pietsch, T. W. (1997). A Revision of the Osmerid Genus  
557 *Hypomesus* Gill (Teleostei : Salmoniformes), with the Description of a New Species

- 558 from the Southern Kuril Islands A Revision of the Osmerid Genus *Hypomesus* Gill  
559 (Teleostei : Salmoniformes), with the Description of a New Spec. *Species Diversity*,  
560 Vol. 2, pp. 59–82. <https://doi.org/10.12782/specdiv.2.59>
- 561 Shi, K. P., Dong, S. L., Zhou, Y. G., Li, Y., Gao, Q. F., & Sun, D. J. (2019). RNA-seq  
562 reveals temporal differences in the transcriptome response to acute heat stress in the  
563 Atlantic salmon (*Salmo salar*). *Comparative Biochemistry and Physiology - Part D:*  
564 *Genomics and Proteomics*, 30(February), 169–178.  
565 <https://doi.org/10.1016/j.cbd.2018.12.011>
- 566 Simão, F. A., Waterhouse, R. M., Ioannidis, P., Kriventseva, E. V., & Zdobnov, E. M.  
567 (2015). BUSCO: Assessing genome assembly and annotation completeness with  
568 single-copy orthologs. *Bioinformatics*, 31(19), 3210–3212.  
569 <https://doi.org/10.1093/bioinformatics/btv351>
- 570 Volff, J. N. (2005). Genome evolution and biodiversity in teleost fish. *Heredity*, Vol. 94,  
571 pp. 280–294. <https://doi.org/10.1038/sj.hdy.6800635>
- 572 Volkoff, H., & Rønnestad, I. (2020). Effects of temperature on feeding and digestive  
573 processes in fish. *Temperature*, 0(0), 1.  
574 <https://doi.org/10.1080/23328940.2020.1765950>
- 575 Von Schalburg, K. R., Leong, J., Cooper, G. A., Robb, A., Beetz-Sargent, M. R., Lieph,  
576 R., ... Koop, B. F. (2008). Rainbow smelt (*Osmerus mordax*) genomic library and  
577 EST resources. *Marine Biotechnology*, Vol. 10, pp. 487–491.  
578 <https://doi.org/10.1007/s10126-008-9089-6>
- 579 Walker, B. J., Abeel, T., Shea, T., Priest, M., Abouelliel, A., Sakthikumar, S., ... Earl, A.

580 M. (2014). Pilon: An integrated tool for comprehensive microbial variant detection  
581 and genome assembly improvement. *PLoS ONE*, Vol. 9.

582 <https://doi.org/10.1371/journal.pone.0112963>

583 Yu, G., Wang, L. G., Han, Y., & He, Q. Y. (2012). ClusterProfiler: An R package for  
584 comparing biological themes among gene clusters. *OMICS A Journal of Integrative*  
585 *Biology*, 16(5), 284–287. <https://doi.org/10.1089/omi.2011.0118>

586

587

588

589

590

591

592

593

594

595

596

597

598

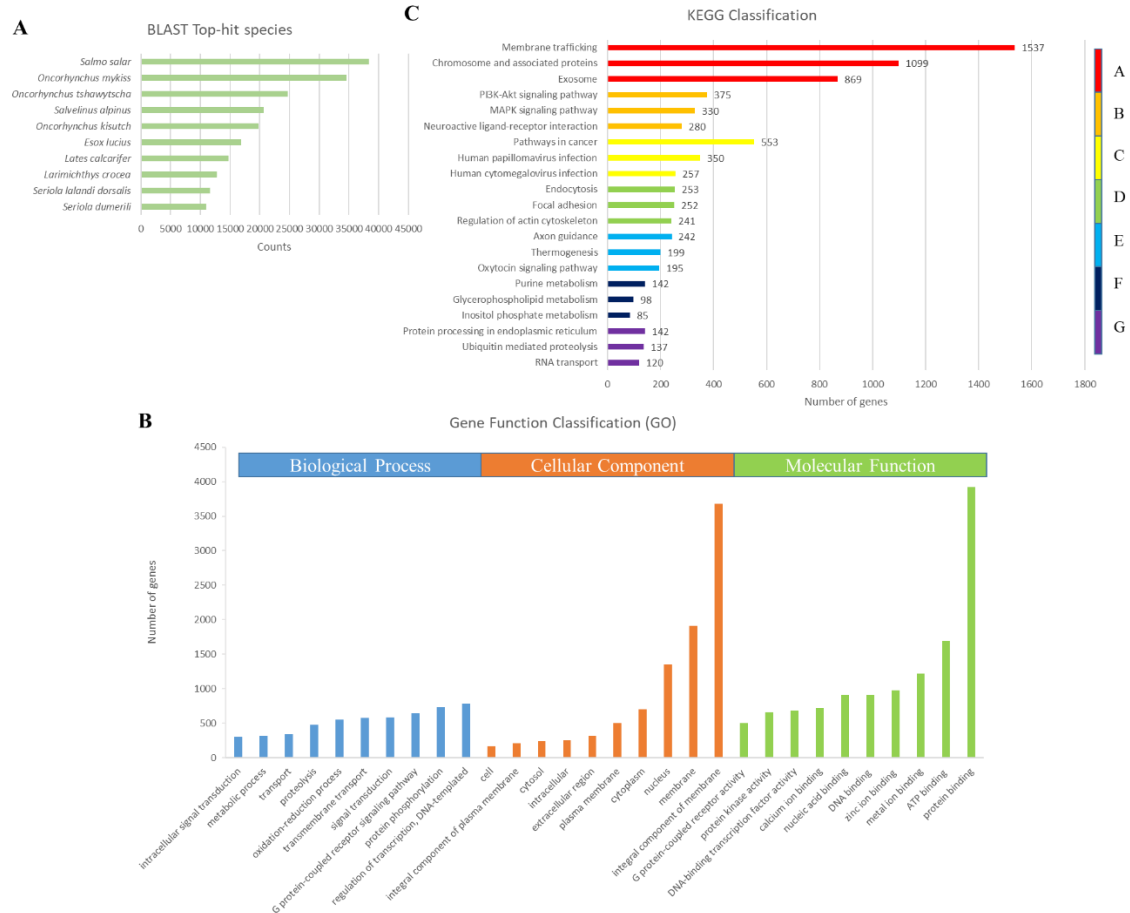

599

600 **Figure 1 Annotation and functional classification of unigenes in genome of *H.***

601 *nipponensis*. (A) Blast top 10 hit species. (B) GO analysis was performed at level 2 for

602 the three main categories (biological process, cellular component and molecular function).

603 (C) Pathway assignment based on the Kyoto Encyclopedia of Genes and Genomes

604 (KEGG) database. Unigenes were classified into seven main categories (A: Genetic

605 Information Processing; B: Metabolism; C: Organismal Systems; D: Cellular Processes;

606 E: Human Diseases; F: Environmental Information Processing; G: Brite Hierarchies).

607

608

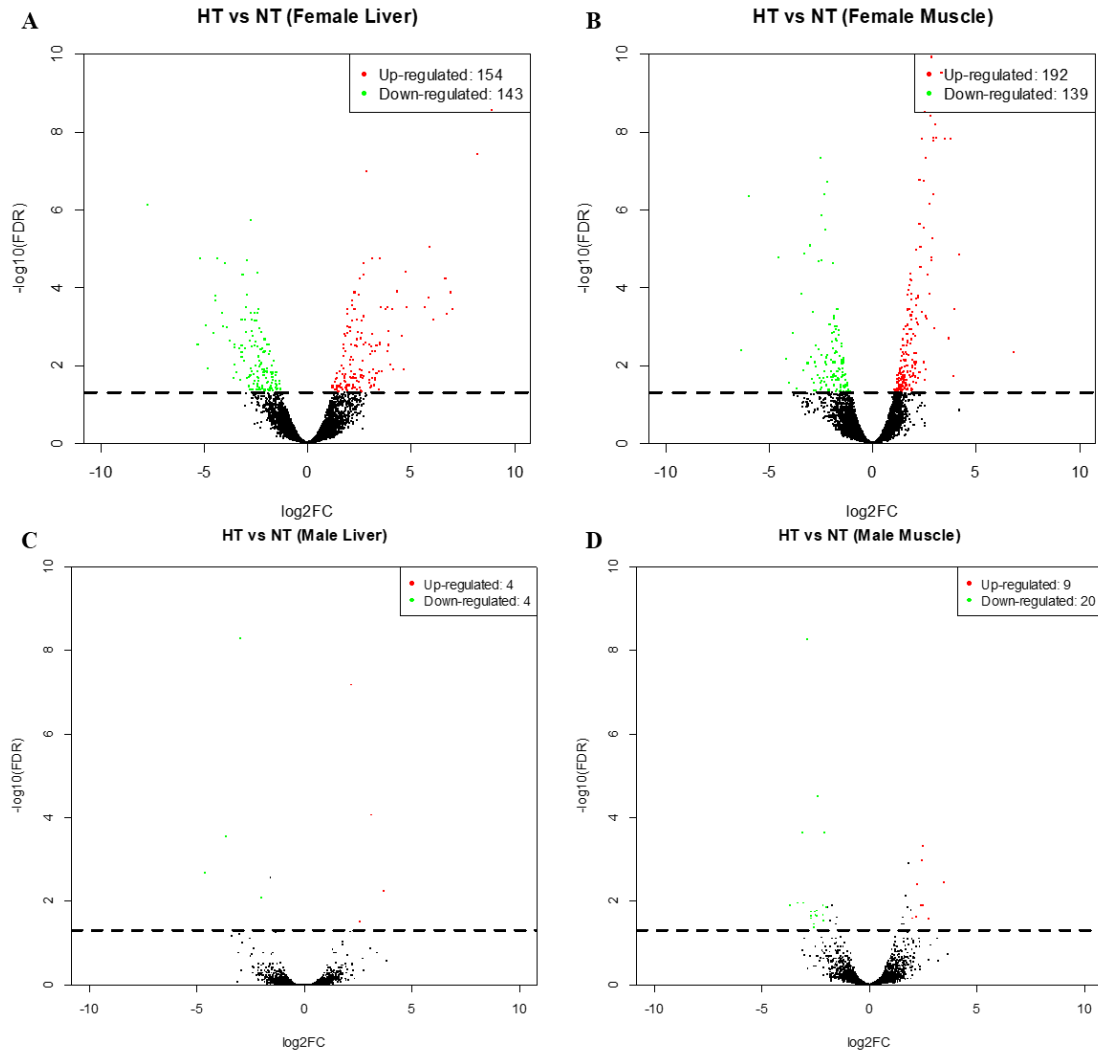

609

610 **Figure 2. Differential expression of high-temperature in *H. nipponensis* versus low-**

611 **temperature. A. DEGs in female liver. B. DEGs in female muscle. C. DEGs in male**

612 **liver. D. DEGs in male muscle. The dots above the dotted line are  $\text{FDR} < 0.05$ ,  $|\log_2\text{FC}| \geq$**

613 **1.**

614

615

616

617

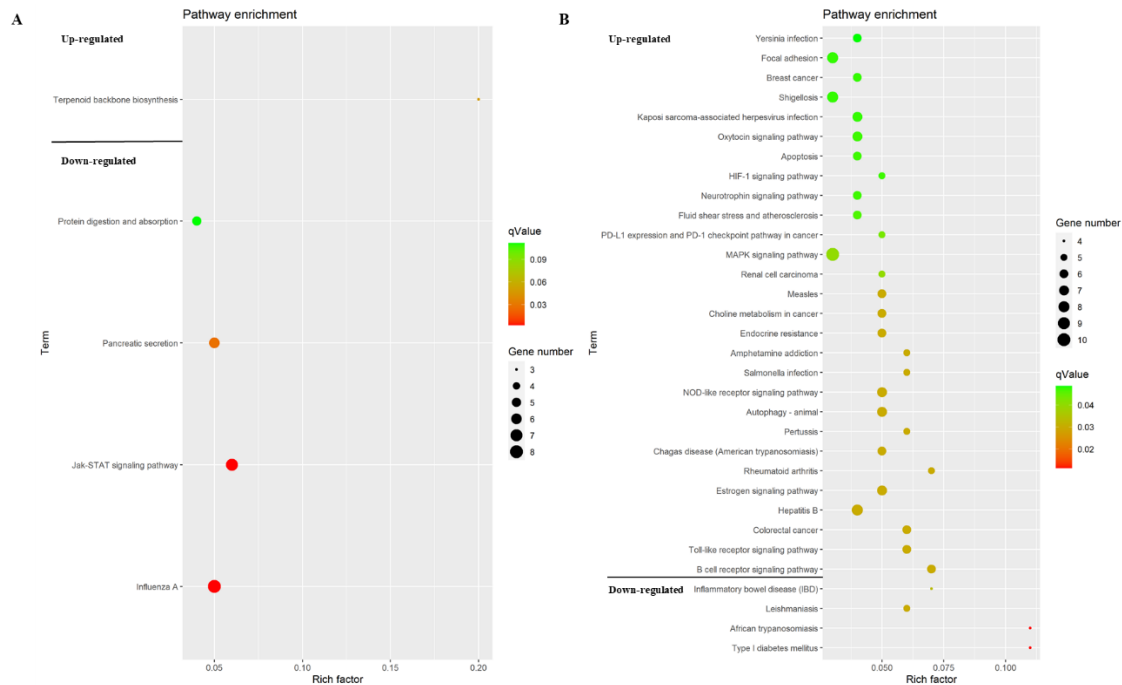

618

619 **Figure 3 An overview of the KEGG pathway significantly enriched in DEGs in the**  
 620 **(A) Liver, (B) Muscle.** The specific pathways are plotted along the y-axis, and the x-axis  
 621 indicates the enrichment factor. The size colored dots indicates the number of  
 622 significantly DEGs associated with each corresponding pathway: pathway with larger-  
 623 sized dots contain a higher number of genes. The color of the each dot indicates the  
 624 corrected p-value for the corresponding pathway.

625

626

627

628

629

**Table 1.** *Hypomesus nipponensis* draft genome statistics.

| <b>Index</b>                         | <b><i>Hypomesus nipponensis</i></b> |
|--------------------------------------|-------------------------------------|
| Number of contigs                    | 1,987                               |
| Total contig length                  | 498,930,205                         |
| Estimated genome size                | 464,167,205                         |
| Total length / Estimated genome size | 107.48%                             |
| Minimum contig length                | 19,619                              |
| Maximum contig length                | 3,031,274                           |
| Average contig length                | 251,097                             |
| Contig length N50                    | 464,523                             |
| GC contents                          | 45.63%                              |
| BUSCO (Actinopterygii) complete      | 93.58%                              |
| BUSCO (Vertebrata) complete          | 95.32%                              |
| CEGMA complete                       | 92.74%                              |

630

**Table 2.** *Hypomesus nipponensis* consensus gene model.

| <b>Category</b> | <b>Index</b>          | <b>Value</b>               |
|-----------------|-----------------------|----------------------------|
| <b>Gene</b>     | Gene count            | 20,644                     |
|                 | Maximum gene length   | 207,358 (HYNIP00072CG0010) |
|                 | Minimum gene length   | 222 (HYNIP00473CG0050)     |
|                 | Average gene length   | 12,073.93                  |
|                 | Total gene length     | 249,254,225                |
|                 | Genome coverage       | 49.96%                     |
| <b>Exon</b>     | Exon count            | 193,124                    |
|                 | Exon count per gene   | 9.35                       |
|                 | Average exon length   | 178                        |
|                 | Total exon length     | 34,376,477                 |
|                 | Genome coverage       | 6.89%                      |
| <b>Intron</b>   | Intron count          | 172,480                    |
|                 | Average intron length | 1,245.81                   |
|                 | Total intron length   | 214,877,748                |
|                 | Genome coverage       | 43.07%                     |

631

632

633

634

**Table 3.** Gene enrichment analysis of DEGs in liver tissue under heat stress.

| Category           | GO ID                 | GO term                                   | Bg_Ge<br>ne                      | Tg_Ge<br>ne | Bg_Ge<br>ne | Tg_Ge<br>ne | P val<br>ue | Odds ra<br>tio |       |
|--------------------|-----------------------|-------------------------------------------|----------------------------------|-------------|-------------|-------------|-------------|----------------|-------|
| Up-regulate<br>d   | GO:0008610            | lipid biosynthetic process                | 15955                            | 128         | 127         | 7           | 0.00        | 6.87           |       |
|                    | GO:0006629            | lipid metabolic process                   | 15955                            | 128         | 371         | 10          | 0.00        | 3.36           |       |
|                    | GO:0006720            | isoprenoid metabolic process              | 15955                            | 128         | 24          | 4           | 0.00        | 20.76          |       |
|                    | Lipid metabolism      | GO:0008299                                | isoprenoid biosynthetic process  | 15955       | 128         | 13          | 3           | 0.00           | 28.74 |
|                    |                       | GO:0006721                                | terpenoid metabolic process      | 15955       | 128         | 16          | 2           | 0.01           | 15.57 |
|                    |                       | GO:0008202                                | steroid metabolic process        | 15955       | 128         | 35          | 4           | 0.00           | 14.24 |
|                    |                       | GO:0016125                                | sterol metabolic process         | 15955       | 128         | 17          | 3           | 0.00           | 21.98 |
|                    |                       | GO:0006694                                | steroid biosynthetic process     | 15955       | 128         | 21          | 3           | 0.00           | 17.79 |
| Cell death         | GO:0042981            | regulation of apoptotic process           | 15955                            | 128         | 154         | 6           | 0.00        | 4.86           |       |
|                    | GO:0043067            | regulation of programmed cell death       | 15955                            | 128         | 157         | 6           | 0.00        | 4.76           |       |
|                    | GO:0010941            | regulation of cell death                  | 15955                            | 128         | 164         | 6           | 0.00        | 4.56           |       |
| DNA binding        | GO:0030983            | mismatched DNA binding                    | 15955                            | 128         | 13          | 2           | 0.01        | 19.16          |       |
|                    | GO:0006298            | mismatch repair                           | 15955                            | 128         | 15          | 2           | 0.01        | 16.61          |       |
|                    | GO:0003690            | double-stranded DNA binding               | 15955                            | 128         | 117         | 4           | 0.02        | 4.26           |       |
| Stress             | GO:0080135            | regulation of cellular response to stress | 15955                            | 128         | 49          | 3           | 0.01        | 7.63           |       |
|                    | GO:0080134            | regulation of response to stress          | 15955                            | 128         | 78          | 3           | 0.03        | 4.79           |       |
| Down-regu<br>lated | GO:0030099            | myeloid cell differentiation              | 15955                            | 115         | 44          | 4           | 0.00        | 12.60          |       |
|                    | GO:0030218            | erythrocyte differentiation               | 15955                            | 115         | 23          | 3           | 0.00        | 18.08          |       |
|                    | GO:0048821            | erythrocyte development                   | 15955                            | 115         | 10          | 2           | 0.00        | 27.69          |       |
|                    | GO:0061515            | myeloid cell development                  | 15955                            | 115         | 16          | 2           | 0.01        | 17.33          |       |
|                    | Membrane pr<br>oteins | GO:0005834                                | heterotrimeric G-protein complex | 15955       | 115         | 30          | 3           | 0.00           | 13.87 |
| GO:1905360         |                       | GTPase complex                            | 15955                            | 115         | 30          | 3           | 0.00        | 13.87          |       |
| Digestion          | GO:0007586            | digestion                                 | 15955                            | 115         | 13          | 2           | 0.01        | 21.33          |       |

635

636



**Table 4.** Gene enrichment analysis of DEGs in muscle tissue under heat stress.

| Category               | GO ID                   | GO term                                                               | Bg_ Gene                                     | Tg_ Gene | G_ Gene | P_ Gene | va  | Odds       |
|------------------------|-------------------------|-----------------------------------------------------------------------|----------------------------------------------|----------|---------|---------|-----|------------|
|                        |                         |                                                                       | ene                                          | ene      | ene     | ene     | lue | ratio      |
| Apoptosis              | GO:0097190              | apoptotic signaling pathway                                           | 1595                                         | 5        | 161     | 16      | 3   | 0.00 18.56 |
|                        | GO:008630               | intrinsic apoptotic signaling pathway in response to DNA damage       | 1595                                         | 5        | 161     | 8       | 2   | 0.00 24.74 |
|                        | GO:0097193              | intrinsic apoptotic signaling pathway                                 | 1595                                         | 5        | 161     | 13      | 2   | 0.01 15.24 |
|                        | GO:006293               | response to decreased oxygen levels                                   | 1595                                         | 5        | 161     | 17      | 2   | 0.02 11.65 |
| Hypoxia                | GO:001666               | response to hypoxia                                                   | 1595                                         | 5        | 161     | 17      | 2   | 0.02 11.65 |
|                        | GO:005278               | calcium-release channel activity                                      | 1595                                         | 5        | 161     | 30      | 3   | 0.00 9.91  |
| Ion transportation     | GO:009604               | ligand-gated calcium channel activity                                 | 1595                                         | 5        | 161     | 31      | 3   | 0.00 9.59  |
|                        | GO:009722               | calcium-mediated signaling                                            | 1595                                         | 5        | 161     | 15      | 2   | 0.01 13.20 |
| Up-regulated           | GO:0003700              | DNA-binding transcription factor activity                             | 1595                                         | 5        | 161     | 525     | 17  | 0.00 3.21  |
|                        | GO:0001110              | transcription regulator activity                                      | 1595                                         | 5        | 161     | 608     | 18  | 0.00 2.93  |
|                        | GO:0000981              | DNA-binding transcription factor activity, RNA polymerase II-specific | 1595                                         | 5        | 161     | 102     | 5   | 0.00 4.86  |
|                        | GO:0006355              | regulation of transcription, DNA-templated                            | 1595                                         | 5        | 161     | 1038    | 21  | 0.00 2.00  |
| Component organization | GO:0051639              | actin filament network formation                                      | 1595                                         | 5        | 161     | 2       | 2   | 0.00 98.80 |
|                        | GO:0052432              | actin filament bundle                                                 | 1595                                         | 5        | 161     | 4       | 2   | 0.00 49.42 |
|                        | GO:0051017              | actin filament bundle assembly                                        | 1595                                         | 5        | 161     | 22      | 3   | 0.00 13.50 |
|                        | GO:0051572              | actin filament bundle organization                                    | 1595                                         | 5        | 161     | 24      | 3   | 0.00 12.38 |
|                        | Nicotinamide nucleotide | GO:0019359                                                            | nicotinamide nucleotide biosynthetic process | 1595     | 5       | 114     | 13  | 2          |
| GO:0016496             |                         | nicotinamide nucleotide metabolic process                             | 1595                                         | 5        | 114     | 15      | 2   | 0.01 18.65 |
| GO:0019363             |                         | pyridine nucleotide biosynthetic process                              | 1595                                         | 5        | 114     | 15      | 3   | 0.00 27.93 |
| GO:0019362             |                         | pyridine nucleotide metabolic process                                 | 1595                                         | 5        | 114     | 16      | 3   | 0.00 26.19 |
| GO:0012525             |                         | pyridine-containing compound biosynthetic process                     | 1595                                         | 5        | 114     | 18      | 3   | 0.00 23.29 |
| GO:0012524             |                         | pyridine-containing compound metabolic process                        | 1595                                         | 5        | 114     | 19      | 3   | 0.00 22.07 |
| Ubiquitination         |                         | GO:0061630                                                            | ubiquitin protein ligase activity            | 1595     | 5       | 114     | 73  | 3          |
|                        | GO:0061659              | ubiquitin-like protein ligase activity                                | 1595                                         | 5        | 114     | 73      | 3   | 0.02 5.75  |
